# Supplementary material for: Enhanced Degradation of Rhodamine B through Peroxymonosulfate Activated by a Metal Oxide/Carbon Nitride Composite
Source: MDPI journal article supplement (doi:10.3390/w14132054), 2022-06-27
Supplement: s1 [file s1]

Archive with 1 entries (1 files):
- water-1798501-supplementary.pdf
