# Supplementary material for: Enhanced Degradation of Rhodamine B through Peroxymonosulfate Activated by a Metal Oxide/Carbon Nitride Composite
Source: MDPI journal article supplement (doi:10.3390/w14132054), 2022-06-27
Supplement: s1 [file s1 › water-1798501-supplementary.pdf]

## **Enhanced degradation of Rhodamine B through peroxymonosulfate activated by a metal oxide/carbon nitride composite**

### **Text S1 Chemicals and reagents**

Rhodamine B (RhB), potassium hydrogen persulfate (PMS),  $\text{Cu}(\text{NO}_3)_2 \cdot 3\text{H}_2\text{O}$ ,  $\text{Mg}(\text{NO}_3)_2 \cdot 6\text{H}_2\text{O}$ , urea, methanol (MeOH), isopropanol (IPA), p-benzoquinone (p-BQ), L-Histidine, 5,5-dimethyl-pyrroline-N-oxide (DMPO), 4-Amino-2,2,6,6-tetramethylpiperidine (TEMP), Congo Red (CR), Methylene blue (MB) and Tetracycline (TC) were purchased from Aladdin Reagent Co., Ltd. (Shanghai, China). Both citric acid (CA) and melamine were purchased from Macleans Reagent Co., Ltd. (Shanghai, China). All reagents and drugs were of analytical grade. The solutions in the experiment were all configured with deionized water.

### **Test S2 Degradation experiment**

Generally, the degradation experiment was carried out in a 125 mL glass beaker containing 100.0 mL RhB solution (5.0 mg/L-20.0 mg/L) and catalyst (0.10 g/L-0.60 g/L) at room temperature ( $25 \pm 2$  °C). The mixture was stirred mechanically for 10 min. After reaching the adsorption and desorption equilibrium between the RhB and the catalyst, PMS (0.50 mM-3.0 mM) was introduced into the system under constant stirring. At specified time intervals, 2.0 mL of suspension was taken out and immediately filtered through a 0.22- $\mu\text{m}$  syringe filter for analysis. If necessary, the initial pH of reaction was adjusted from 3.0 to 11.0 by adding 0.10 M  $\text{H}_2\text{SO}_4$  or 0.10 M NaOH. As a control, the adsorption of RhB by CM/g- $\text{C}_3\text{N}_4$  and the degradation of RhB by PMS were implemented. The degradation of Congo Red

(CR)/Methylene blue (MB)/Tetracycline (TC) and RhB removal in different water matrixes were carried out by the same procedures. The catalyst was recovered after the reaction, washed with ethanol and deionized water, and dried under vacuum at 60 °C, then used in the next reaction under similar experimental conditions to evaluate the reusability of CM/g-C<sub>3</sub>N<sub>4</sub>. For determining the active substances, in addition to CM/g-C<sub>3</sub>N<sub>4</sub>, PMS and RhB, quantified scavengers (MeOH, IPA, p-BQ and L-Histidine) were added to the reactor.

### **Text S3 Characterizations**

The microstructural of catalyst was revealed by scanning electron microscopy (SEM, ZEISS Gemini 300) equipped with an energy dispersive spectrometer (EDS) detector system and high-resolution transmission electron microscope (HRTEM, JEOL JEM-2100). X-ray powder diffraction (XRD) patterns of the catalysts were measured on a Bruker D8 X-ray diffractometer using Cu K $\alpha$  radiation ( $\lambda$  = 0.1542 nm). The specific surface areas and pore characteristics of the catalysts were investigated using the Brunauer-Emmett-Teller (BET) N<sub>2</sub> adsorption-desorption method with a Micromeritics ASAP 2460 instrument. The surface components of CM/g-C<sub>3</sub>N<sub>4</sub> before and after the degradation were determined by X-ray photoelectron spectroscopy (XPS, Thermo Scientific K-Alpha). The functional groups of catalyst were characterized by Fourier transform infrared spectroscopy (FTIR, Vertex 70).

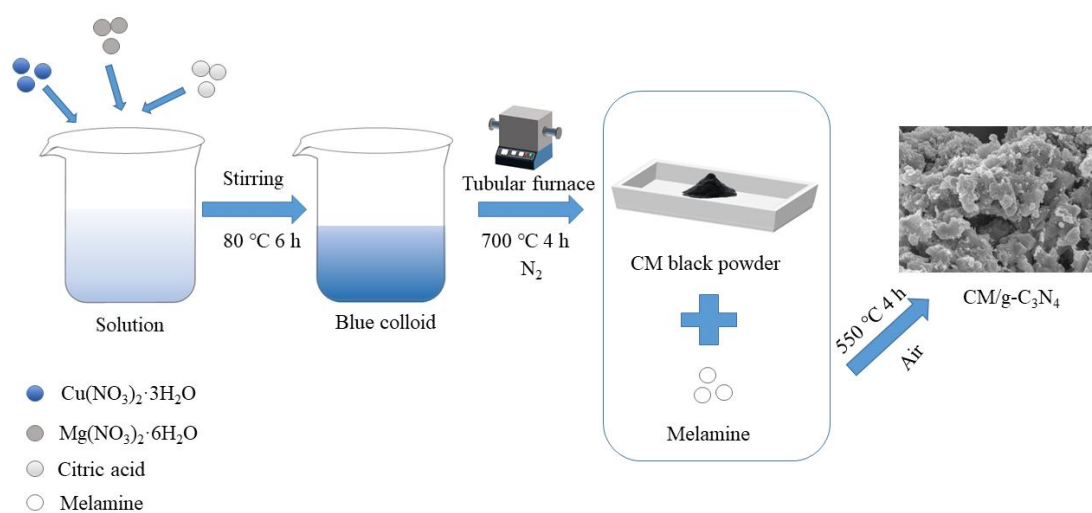

**Scheme S1** Preparation of CM/g- $\text{C}_3\text{N}_4$ .

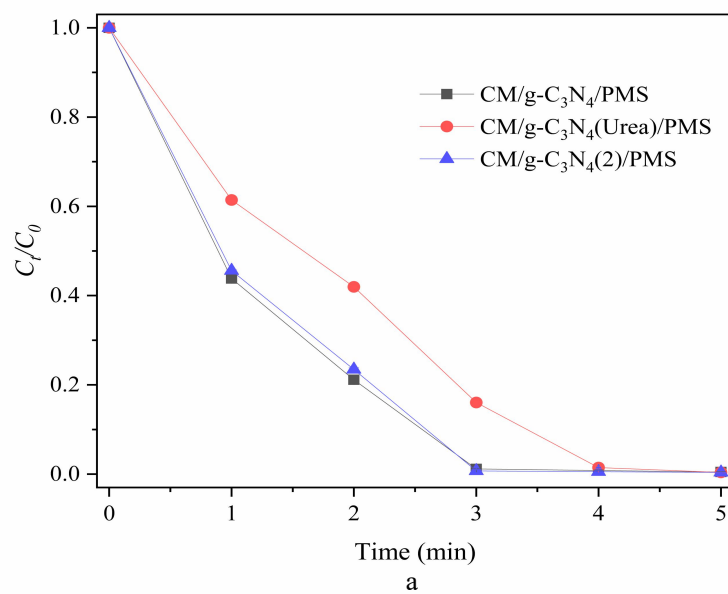

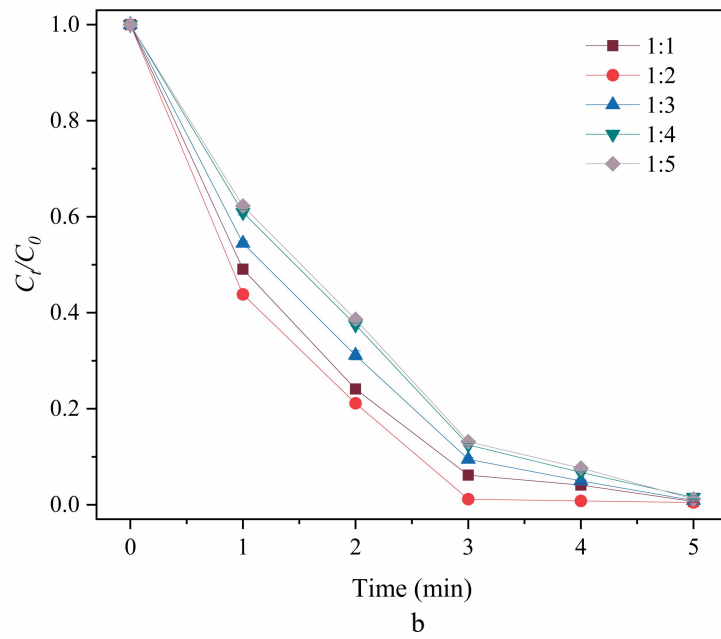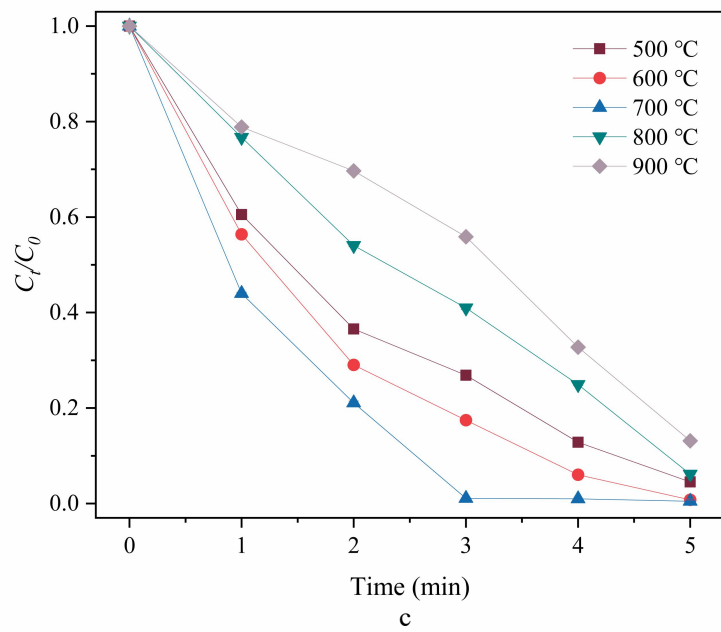

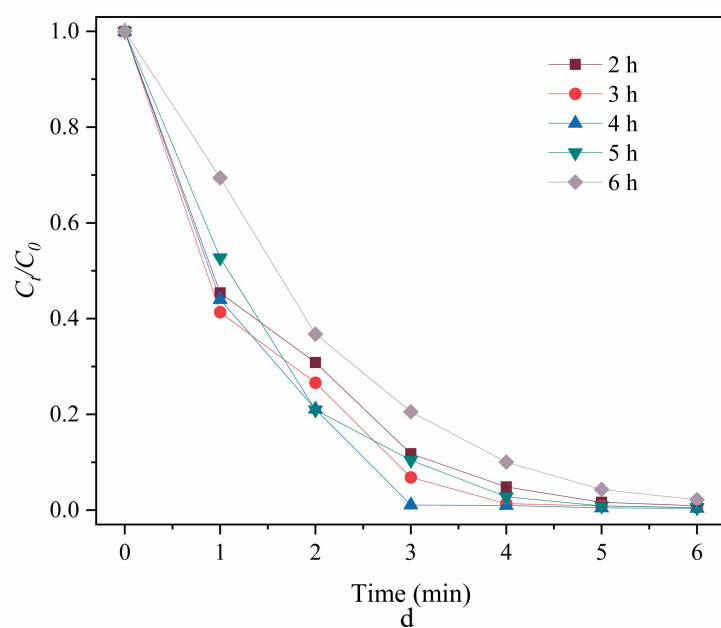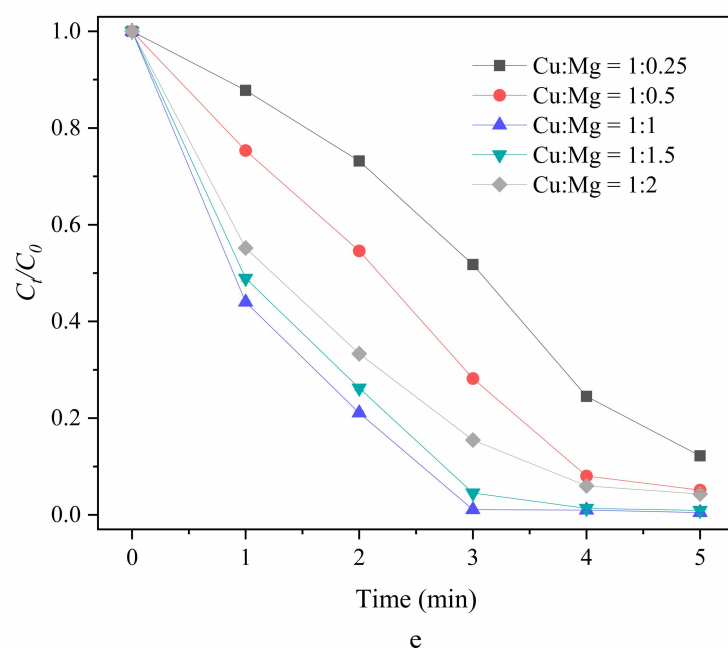

**Figure S1** Effects of different g-C<sub>3</sub>N<sub>4</sub> precursors (a), mass ratios of copper-magnesium oxide to melamine (b), pyrolysis temperatures (c), pyrolysis times (d) and molar ratios of copper to magnesium precursor (e) on the catalytic performance of material. Reaction conditions: [PMS] = 2.0 mM, [catalyst] = 0.50 g/L, [RhB] = 10.0 mg/L, 25 °C.

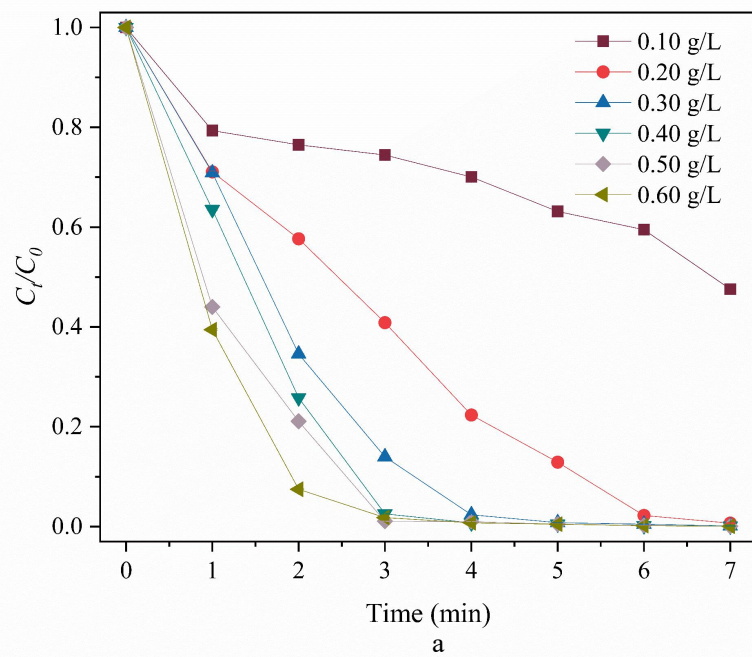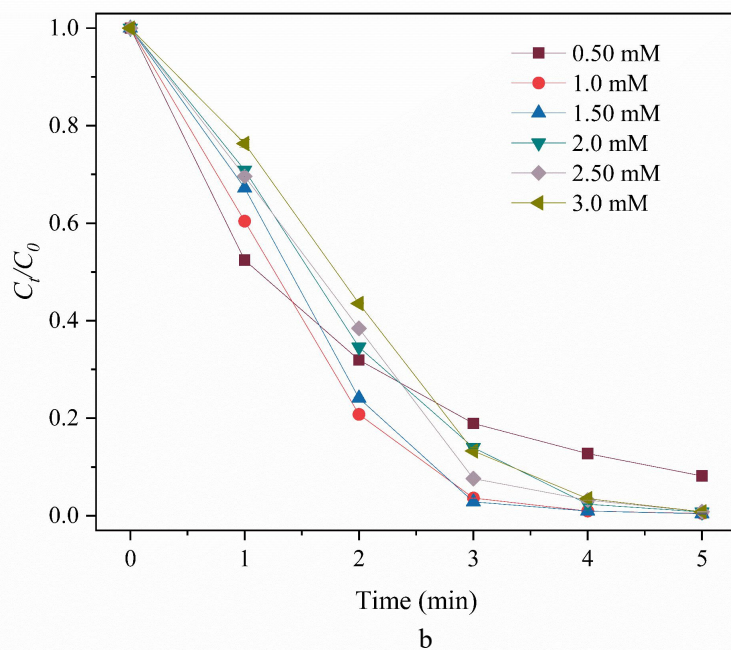

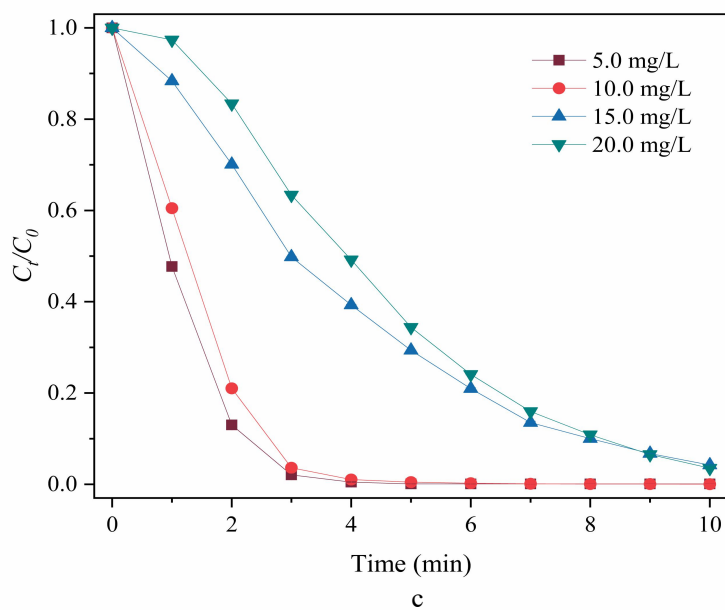

**Figure S2** Effects of catalyst dosage (a), PMS concentration (b) and RhB concentration (c) for RhB degradation. Reaction conditions: [PMS] = 0.50-3.0 mM, [CM/g-C<sub>3</sub>N<sub>4</sub>] = 0.10-0.60 g/L, [RhB] = 5.0-20.0 mg/L, 25 °C.

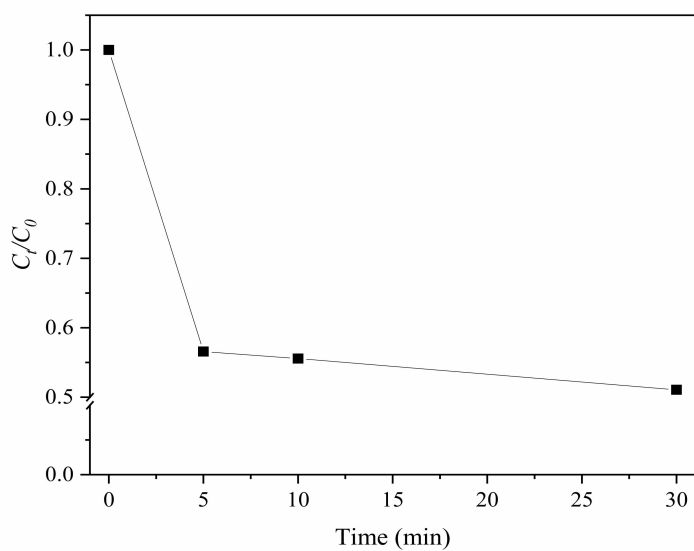

**Figure S3** Mineralization efficiency of CM/g-C<sub>3</sub>N<sub>4</sub>/PMS system. Reaction conditions: [PMS] = 1.0 mM, [CM/g-C<sub>3</sub>N<sub>4</sub>] = 0.30 g/L, [RhB] = 10.0 mg/L, 25 °C.

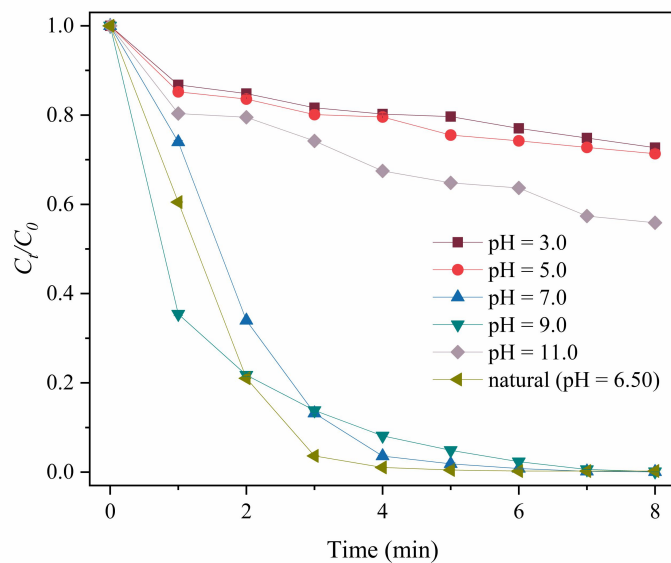

**Figure S4** Effect of initial pH for RhB degradation in the CM/g-C<sub>3</sub>N<sub>4</sub>/PMS system. Reaction conditions: [PMS] = 1.0 mM, [CM/g-C<sub>3</sub>N<sub>4</sub>] = 0.30 g/L, [RhB] = 10.0 mg/L, 25 °C.

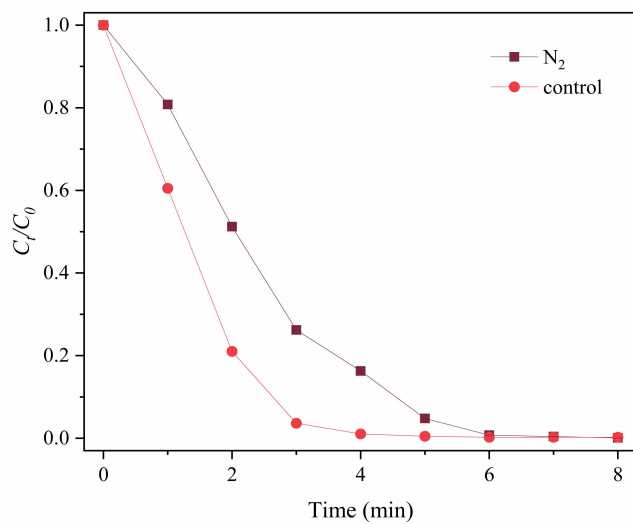

**Figure S5** Effect of nitrogen on the degradation of RhB in the CM/g-C<sub>3</sub>N<sub>4</sub>/PMS system. Reaction conditions: [PMS] = 1.0 mM, [CM/g-C<sub>3</sub>N<sub>4</sub>] = 0.30 g/L, [RhB] = 10.0 mg/L, N<sub>2</sub> = 100.0 mL/min, 25 °C.

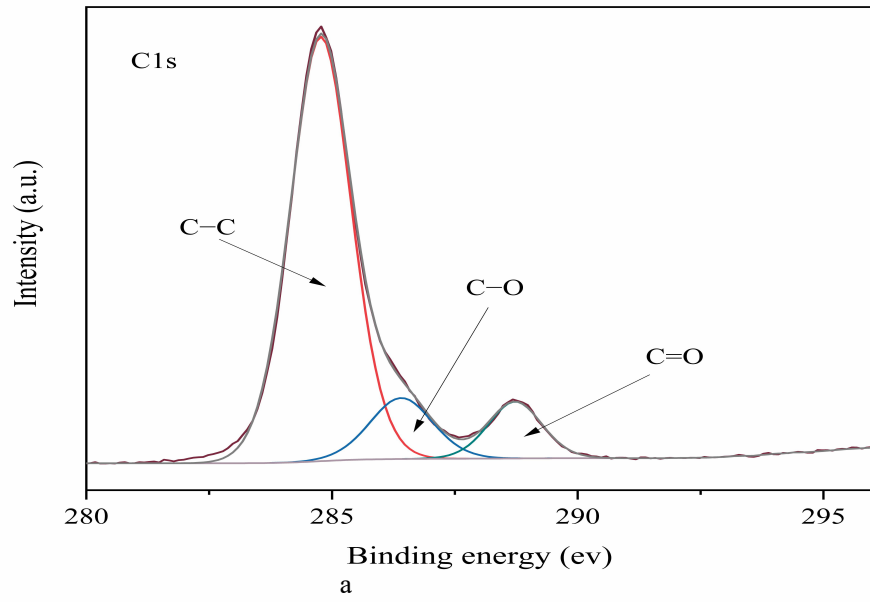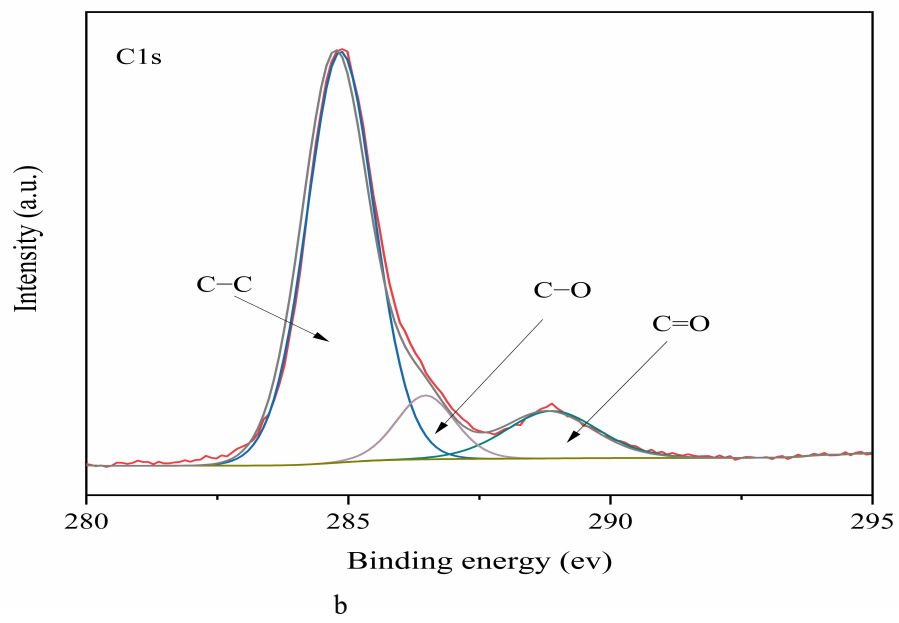

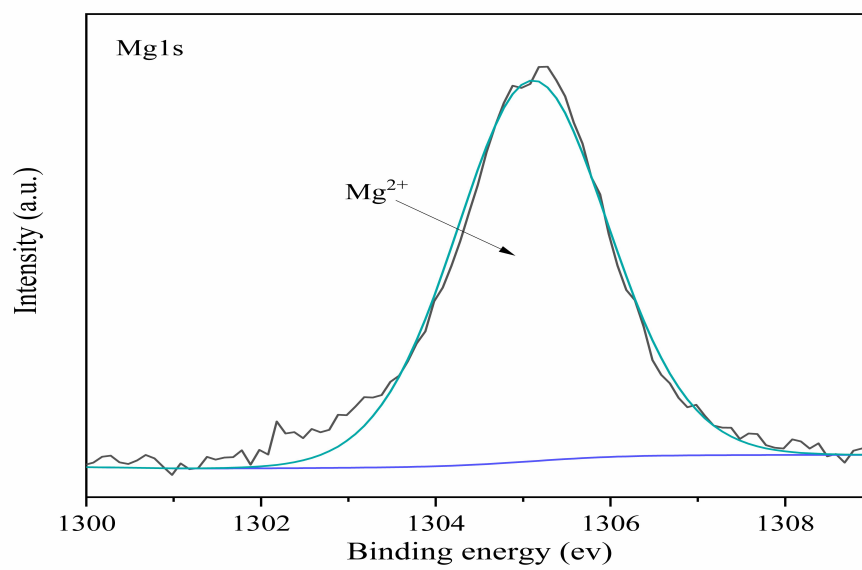

c

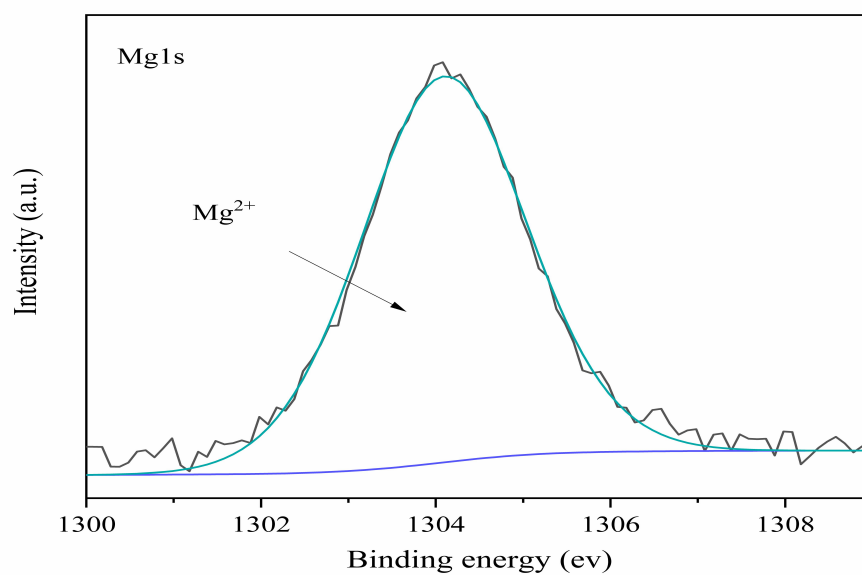

d

**Figure S6** X-ray photoelectron spectroscopy spectra of C1s (a, b) and Mg 1s (c, d) in the CM/g- $\text{C}_3\text{N}_4$  before (a, c) and after (b, d) the reaction.

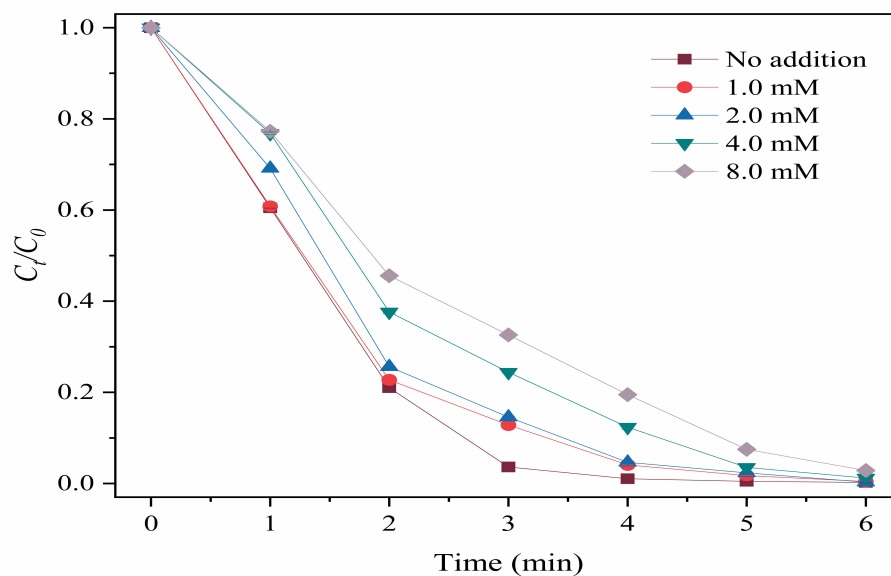

**Figure S7** Effect of  $\text{H}_2\text{PO}_4^-$  on the degradation of RhB in the CM/g- $\text{C}_3\text{N}_4$ /PMS system.

Reaction conditions: [PMS] = 1.0 mM, [CM/g- $\text{C}_3\text{N}_4$ ] = 0.30 g/L, [RhB] = 10.0 mg/L, 25 °C.

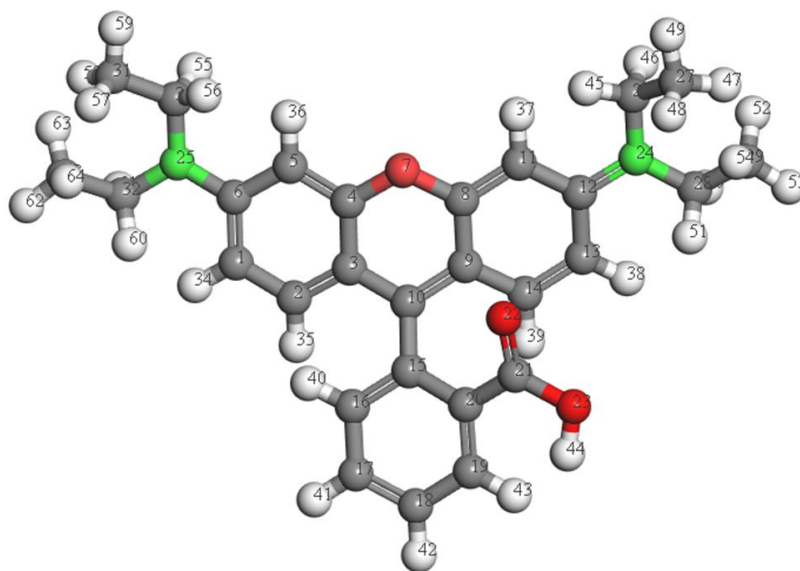

**Figure S8** The molecular structure of the optimized RhB (a) (oxygen, red; carbon, gray; nitrogen, green; hydrogen, white).

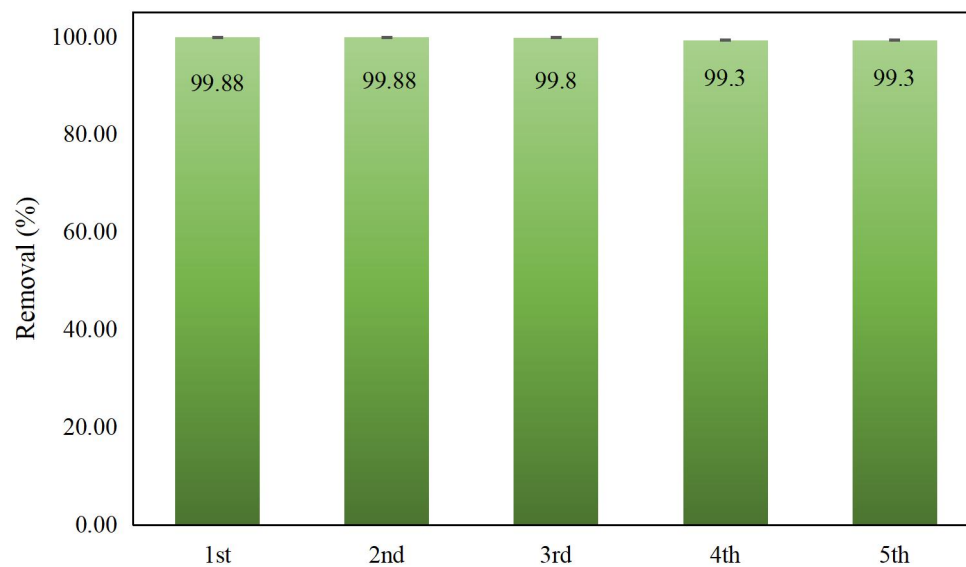

**Figure S9** Degradation of RhB with the recycled CM/g-C<sub>3</sub>N<sub>4</sub>. Reaction conditions: [PMS] = 1.0 mM, [CM/g-C<sub>3</sub>N<sub>4</sub>] = 0.30 g/L, [RhB] = 10.0 mg/L, 25 °C.

**Table S1** *k* value of CM/g-C<sub>3</sub>N<sub>4</sub>/PMS system in different conditions.

| Catalyst | PMS           | RhB           |                      |
|----------|---------------|---------------|----------------------|
| dosage   | concentration | concentration | <i>k</i> value       |
| (g/L)    | (mM)          | (mg/L)        | (min <sup>-1</sup> ) |
| 0.10     | 2.0           | 10.0          | 0.0867               |
| 0.20     | 2.0           | 10.0          | 0.3550               |
| 0.30     | 2.0           | 10.0          | 1.0107               |
| 0.40     | 2.0           | 10.0          | 1.1119               |
| 0.50     | 2.0           | 10.0          | 1.1759               |
| 0.60     | 2.0           | 10.0          | 1.2916               |
| 0.30     | 0.50          | 10.0          | 0.4939               |
| 0.30     | 1.0           | 10.0          | 1.1703               |
| 0.30     | 1.50          | 10.0          | 1.1596               |
| 0.30     | 2.0           | 10.0          | 1.0107               |
| 0.30     | 2.50          | 10.0          | 0.9911               |
| 0.30     | 3.0           | 10.0          | 0.8455               |
| 0.30     | 1.0           | 5.0           | 1.4365               |
| 0.30     | 1.0           | 10.0          | 1.1703               |
| 0.30     | 1.0           | 15.0          | 0.2543               |
| 0.30     | 1.0           | 20.0          | 0.2187               |

**Table S2** RhB degradation in different system.

|                                                                | Catalyst<br>dosage<br>(g/L) | PMS<br>concentration<br>(mM) | RhB<br>concentration<br>(mg/L) | Reaction<br>time<br>(min) | <i>k</i> value<br>(min <sup>-1</sup> ) | Removal<br>efficiency | Ref.         |
|----------------------------------------------------------------|-----------------------------|------------------------------|--------------------------------|---------------------------|----------------------------------------|-----------------------|--------------|
| Fe <sub>3</sub> O <sub>4</sub> /Co <sub>3</sub> S <sub>4</sub> | 0.05                        | 1.0                          | 200.0                          | 20                        | 0.302                                  | 100.00%               | [1]          |
| 5%-T/LDOs                                                      | 0.50                        | 5.0                          | 10.0                           | 10                        | 0.4537                                 | 95.80%                | [2]          |
| Co-G                                                           | 0.02                        | 0.16                         | 50.0                           | 10                        | 0.9438                                 | 100.00%               | [3]          |
| Co <sub>1+x</sub> Fe <sub>2-x</sub> O <sub>4</sub>             | 0.20                        | 0.65                         | 40.0                           | 30                        | 0.260                                  | 91.20%                | [4]          |
| CM/g-C <sub>3</sub> N <sub>4</sub>                             | 0.30                        | 1.0                          | 10.0                           | 5                         | 1.1703                                 | 99.88%                | This<br>work |

**Table S3** Atomic area ratios of different compositions in the CM/g-C<sub>3</sub>N<sub>4</sub> before and after the reaction.

| Composition      | Before reaction<br>(%) | After reaction<br>(%) |
|------------------|------------------------|-----------------------|
| C-C              | 79.00                  | 77.42                 |
| C-O              | 11.68                  | 10.40                 |
| C=O              | 9.32                   | 12.18                 |
| O <sup>2-</sup>  | 9.58                   | 25.14                 |
| -OH              | 43.27                  | 45.79                 |
| adsorbed oxygen  | 41.99                  | 13.78                 |
| C=N-C            | 86.45                  | 40.03                 |
| C-N              | 13.55                  | 59.97                 |
| Cu <sup>+</sup>  | 42.59                  | 51.14                 |
| Cu <sup>2+</sup> | 57.41                  | 48.86                 |

**Table S4** Partial Fukui indexes of RhB molecule.

| Atom | $f^0$ | Atom | $f^0$ |
|------|-------|------|-------|
| C1   | 0.025 | C18  | 0.040 |
| C4   | 0.023 | C19  | 0.028 |
| C8   | 0.028 | C20  | 0.023 |
| C10  | 0.055 | C21  | 0.035 |
| C11  | 0.027 | O22  | 0.039 |
| C12  | 0.023 | O23  | 0.031 |
| C15  | 0.031 | N24  | 0.023 |
| C16  | 0.029 | N25  | 0.020 |
| C17  | 0.034 |      |       |

## References

1. Shi, X.; Hong, P.; Huang, H.; Yang, D.; Zhang, K.; He, J.; Li, Y.; Wu, Z.; Xie, C.; Liu, J.; Kong, L. Enhanced peroxymonosulfate activation by hierarchical porous Fe<sub>3</sub>O<sub>4</sub>/Co<sub>3</sub>S<sub>4</sub> nanosheets for efficient elimination of rhodamine B: Mechanisms, degradation pathways and toxicological analysis. *Journal of Colloid and Interface Science* **2022**, 610, 751-765.
2. Zhong, Q.; Liu, J.; Wang, J.; Li, Y.; Li, J.; Zhang, G. Efficient degradation of organic pollutants by activated peroxymonosulfate over TiO<sub>2</sub>@C decorated Mg-Fe layered double oxides: Degradation pathways and mechanism. *Chemosphere* **2022**, 300, 134564.
3. Yang, Q.; Zhang, Y.; Liang, J.; Luo, Y.; Liu, Q.; Yang, Y.; Sun, X. Facile hydrothermal synthesis of co-glycerate as an efficient peroxymonosulfate activator for rhodamine B degradation. *Colloids and Surfaces a-Physicochemical and Engineering Aspects* **2022**, 648, 129239.
4. Zhao, J.; Wei, H.; Liu, P.; Zhou, A.; Lin, X.; Zhai, J. Activation of peroxymonosulfate by metal-organic frameworks derived Co<sub>1-x</sub>Fe<sub>2-x</sub>O<sub>4</sub> for organic dyes degradation: A new insight into the synergy effect of Co and Fe. *Journal of Environmental Chemical Engineering* **2021**, 9(4), 105412.
